# Supplementary material for: Immune cell and TCR/BCR repertoire profiling in systemic lupus erythematosus patients by single-cell sequencing
Source: Aging (Albany NY). 2021 Nov 12;13(21):24432–48. doi: 10.18632/aging.203695 (PMC8610142; doi:10.18632/aging.203695)
Supplement: Supplementary Table 1 [file aging-13-203695-s002.xlsx]

## Sheet: Sheet1
Supplementary Table 1. Cluster gene markers.
Cluster	NC group
Cluster1	GZMH	KIR3DL1	CMC1	TRBC1	CCL5
Cluster2	TCF7	NOSIP
Cluster3	CD8B	RP11-291B21.2
Cluster4	IL2RB	PTGDS	ZFP36	XCL1	IER2	CD7	IFITM1	CCL4
Cluster5	GZMK	KLRG1	DUSP2	JUN	TRGV9	TRDV2
Cluster6	LYZ	IL1B	IER3	S100A8	S100A9	S100A12	CXCL8	CD14	CCL3L3	CCL3
Cluster7
Cluster8	IL32	AQP3	IL7R
Cluster9	JCHAIN	IGLV1-44	IGLV3-21	IGLV2-11	IGHV3-21	IGKV3-20	IGKV1-8	IGKV2-30	IGKV1-5	IGKV3-15
Cluster10
Cluster11	HCK	TIMP1	LILRB2	IFITM3	MS4A7	LYPD2	MAFB	LINC01272	LYN	CUX1
Cluster12	TUBB1	TSC22D1	SPARC	CLU	GNG11	NRGN	PPBP	PF4	SDPR	HIST1H2AC
	SLE group
Cluster1	HSP90AB1	PIK3IP1	PGCC	EEF1D	TNFAIP3	YPEL5	G3BP2	NOSIP	CD8B	RP11-291B21.2
Cluster2	G0S2	IL1B	IER3
Cluster3
Cluster4	VCAN	CXCL8	CD14
Cluster5	JCHAIN	IGKV4-1	IGLV1-44	IGHV3-21	IGKV3-20	IGKV3-11	IGKV2-30	IGKV1-12	IGKV1-5	IGKV3-15
Cluster6	LGALS1	TSPO	RETN
Cluster7	CD99	CD3G	B2M	ZNF683	ADGRG1	C12ORF75	TRBV7-2
Cluster8	RGS1	ITGB1	AQP3	ISG20	TRBV20-1
Cluster9
Cluster10	FTL	LILRB1	APOBEC3A	CD68	SAT1	IFI27	C1QA	PASP	AIF1	LST1
Cluster11	TUBB1	MYL9	SPARC	GNG11	NRGN	PF4	SDPR	GP9	HIST1H2AC	C6ORF25
Cluster12	GZMK	STMN1	HMGB2	TUBB	HIST1H4C	HBB
Cluster13
Cluster14	MATK	MYOM2	IL2RB	KLRB1	KLRF1	CLIC3	S1PR5	IFITM2	CD247	TRBC1
Cluster15
Cluster16	LSP1	CD1C	FCER1A	HLA-DMA	IGLV1-51

## Sheet: Sheet2
CD8+ T cell	1909		CD8+ T cell	2822
Effector T cell	1828		Un	2788
Un	1334		Neutrophil	1178
Monocytes	1075		Monocytes	1042
Naïve T cell	1068		B cell	814
NKT	983		Effector T cell	799
Treg cell	769		Treg	600
B cell	608		Macrophage	485
Megakaryocyte	78		Megakaryocyte	421
			NKT	282
			Dendritic cell	264
